# Supplementary material for: Towards new recommendations to reduce the burden of alcohol-induced hypertension in the European Union
Source: Springer Nature journal article supplement (doi:10.1186/s12916-017-0934-1), 2017-09-21
Supplement: MOESM1 [file 15090780]

# AGENDA, INTERNATIONAL EXPERT FORUM BARCELONA, 12-NOV-15

| Time        | Topic                                                                                                      | Presenter        |
|-------------|------------------------------------------------------------------------------------------------------------|------------------|
| 10.00-10.10 | Welcome                                                                                                    | Joan Colom       |
| 10.10-10.40 | Alcohol, hypertension and the WHO targets                                                                  | Lars Møller      |
| 10.40-11.00 | The Expert Roundtable Project: A multi-disciplinary initiative to reduce the mortality burden of NCDs      | Jürgen Rehm      |
| 11.00-11.40 | BASIS: Current clinical practice for alcohol screening and intervention in hypertensive patients in Europe | Didier Duhot     |
| 11.40-12.00 | 20-year implementation of the Drink Less Program in Catalonia                                              | Joan Colom       |
| 12.00-13.00 | Lunch                                                                                                      |                  |
| 13.00-13.20 | Survey on lifestyle changes for hypertension management among German and international physicians          | Reinhold Kreutz  |
| 13.20-13.45 | Dual intervention for harmful alcohol use and hypertension in Catalonia, a demonstration study             | Antoni Gual      |
| 13.45-14.10 | Alcohol and hypertension, a primary care perspective                                                       | Carsten Grimm    |
| 14.10-14.30 | Review of evidence-based solutions to reduce the public health impact of alcohol by Public Health England  | Robyn Burton     |
| 14.30-15.00 | The WHO NCD plan, an introduction to the status of the NCD plan                                            | Michael Roerecke |
| 15.00-15.30 | Coffee break                                                                                               |                  |
| 15.30-16.10 | Panel discussion: From expert recommendations to implementation, what does it take?                        | Helena Liira     |
| 16.10-16.50 | Proposed Consensus Paper - Emphasising the need for action                                                 | Jürgen Rehm      |
| 16.50-17.00 | Closure                                                                                                    | Joan Colom       |
